# Supplementary material for: Accuracy of the microsolvation–continuum approach in computing the pKa and the free energies of formation of phosphate species in aqueous solution
Source: Royal Society of Chemistry journal article supplement (doi:10.1039/c0cp00175a), 2010-01-01
Supplement: c0cp00175a.pdf [file c0cp00175a.pdf]

| <b>H<sub>3</sub>PO<sub>4</sub>+H<sub>3</sub>PO<sub>4</sub> → H<sub>4</sub>P<sub>2</sub>O<sub>7</sub> + H<sub>2</sub>O</b> |       |       |      |      |      |      |
|---------------------------------------------------------------------------------------------------------------------------|-------|-------|------|------|------|------|
| ΔG <sub>aq</sub> Exp.=9.5 kcal/mol                                                                                        |       |       |      |      |      |      |
| n <sub>w</sub> H <sub>3</sub> PO <sub>4</sub> \n <sub>w</sub> H <sub>3</sub> PO <sub>4</sub>                              |       |       |      |      |      |      |
| ΔG <sub>aq</sub>                                                                                                          |       |       |      |      |      |      |
| nw of Dimer                                                                                                               | 0\0   | 0\1   | 0\2  | 0\3  | 0\4  | 0\5  |
| 0                                                                                                                         | 10.9  | 9.5   | 15.7 | 14.2 | 15.0 | 13.0 |
| 1                                                                                                                         | 3.2   | 1.8   | 8.0  | 6.5  | 7.3  | 5.3  |
| 2                                                                                                                         | 4.3   | 3.0   | 9.1  | 7.6  | 8.4  | 6.4  |
| 3                                                                                                                         | 6.2   | 4.8   | 10.9 | 9.4  | 10.2 | 8.3  |
| 4                                                                                                                         | -1.2  | -2.5  | 3.6  | 2.1  | 2.9  | 1.0  |
| 5                                                                                                                         | -5.1  | -6.4  | -0.3 | -1.8 | -1.0 | -3.0 |
| 6                                                                                                                         | -9.5  | -10.8 | -4.7 | -6.2 | -5.4 | -7.3 |
|                                                                                                                           |       |       |      |      |      |      |
| nw of Dimer                                                                                                               | 1\0   | 1\1   | 1\2  | 1\3  | 1\4  | 1\5  |
| 0                                                                                                                         | 9.5   | 8.2   | 14.3 | 12.8 | 13.6 | 11.7 |
| 1                                                                                                                         | 1.8   | 0.5   | 6.6  | 5.1  | 5.9  | 4.0  |
| 2                                                                                                                         | 3.0   | 1.6   | 7.7  | 6.2  | 7.0  | 5.1  |
| 3                                                                                                                         | 4.8   | 3.4   | 9.6  | 8.1  | 8.9  | 6.9  |
| 4                                                                                                                         | -2.5  | -3.9  | 2.3  | 0.7  | 1.6  | -0.4 |
| 5                                                                                                                         | -6.4  | -7.8  | -1.7 | -3.2 | -2.4 | -4.3 |
| 6                                                                                                                         | -10.8 | -12.2 | -6.1 | -7.6 | -6.8 | -8.7 |
|                                                                                                                           |       |       |      |      |      |      |
| nw of Dimer                                                                                                               | 2\0   | 2\1   | 2\2  | 2\3  | 2\4  | 2\5  |
| 0                                                                                                                         | 15.7  | 14.3  | 20.4 | 18.9 | 19.7 | 17.8 |
| 1                                                                                                                         | 8.0   | 6.6   | 12.7 | 11.2 | 12.1 | 10.1 |
| 2                                                                                                                         | 9.1   | 7.7   | 13.8 | 12.3 | 13.2 | 11.2 |
| 3                                                                                                                         | 10.9  | 9.6   | 15.7 | 14.2 | 15.0 | 13.1 |
| 4                                                                                                                         | 3.6   | 2.3   | 8.4  | 6.9  | 7.7  | 5.7  |
| 5                                                                                                                         | -0.3  | -1.7  | 4.4  | 2.9  | 3.8  | 1.8  |
| 6                                                                                                                         | -4.7  | -6.1  | 0.1  | -1.5 | -0.6 | -2.6 |
|                                                                                                                           |       |       |      |      |      |      |
| nw of Dimer                                                                                                               | 3\0   | 3\1   | 3\2  | 3\3  | 3\4  | 3\5  |
| 0                                                                                                                         | 14.2  | 12.8  | 18.9 | 17.4 | 18.2 | 16.3 |
| 1                                                                                                                         | 6.5   | 5.1   | 11.2 | 9.7  | 10.5 | 8.6  |
| 2                                                                                                                         | 7.6   | 6.2   | 12.3 | 10.8 | 11.6 | 9.7  |
| 3                                                                                                                         | 9.4   | 8.1   | 14.2 | 12.7 | 13.5 | 11.5 |
| 4                                                                                                                         | 2.1   | 0.7   | 6.9  | 5.4  | 6.2  | 4.2  |
| 5                                                                                                                         | -1.8  | -3.2  | 2.9  | 1.4  | 2.3  | 0.3  |
| 6                                                                                                                         | -6.2  | -7.6  | -1.5 | -3.0 | -2.1 | -4.1 |
|                                                                                                                           |       |       |      |      |      |      |
| nw of Dimer                                                                                                               | 4\0   | 4\1   | 4\2  | 4\3  | 4\4  | 4\5  |
| 0                                                                                                                         | 15.0  | 13.6  | 19.7 | 18.2 | 19.1 | 17.1 |
| 1                                                                                                                         | 7.3   | 5.9   | 12.1 | 10.5 | 11.4 | 9.4  |
| 2                                                                                                                         | 8.4   | 7.0   | 13.2 | 11.6 | 12.5 | 10.5 |
| 3                                                                                                                         | 10.2  | 8.9   | 15.0 | 13.5 | 14.3 | 12.4 |
| 4                                                                                                                         | 2.9   | 1.6   | 7.7  | 6.2  | 7.0  | 5.1  |
| 5                                                                                                                         | -1.0  | -2.4  | 3.8  | 2.3  | 3.1  | 1.1  |
| 6                                                                                                                         | -5.4  | -6.8  | -0.6 | -2.1 | -1.3 | -3.3 |
|                                                                                                                           |       |       |      |      |      |      |
| nw of Dimer                                                                                                               | 5\0   | 5\1   | 5\2  | 5\3  | 5\4  | 5\5  |
| 0                                                                                                                         | 13.0  | 11.7  | 17.8 | 16.3 | 17.1 | 15.2 |
| 1                                                                                                                         | 5.3   | 4.0   | 10.1 | 8.6  | 9.4  | 7.5  |

|   |      |      |      |      |      |      |
|---|------|------|------|------|------|------|
| 2 | 6.4  | 5.1  | 11.2 | 9.7  | 10.5 | 8.6  |
| 3 | 8.3  | 6.9  | 13.1 | 11.5 | 12.4 | 10.4 |
| 4 | 1.0  | -0.4 | 5.7  | 4.2  | 5.1  | 3.1  |
| 5 | -3.0 | -4.3 | 1.8  | 0.3  | 1.1  | -0.8 |
| 6 | -7.3 | -8.7 | -2.6 | -4.1 | -3.3 | -5.2 |

| <b>H<sub>3</sub>PO<sub>4</sub> + H<sub>2</sub>PO<sub>4</sub><sup>-</sup> → H<sub>3</sub>P<sub>2</sub>O<sub>7</sub><sup>-</sup> + H<sub>2</sub>O</b> |       |       |       |       |       |      |
|-----------------------------------------------------------------------------------------------------------------------------------------------------|-------|-------|-------|-------|-------|------|
| ΔG <sub>aq</sub> Exp.=7.5 kcal/mol                                                                                                                  |       |       |       |       |       |      |
| n <sub>w</sub> H <sub>3</sub> PO <sub>4</sub> \n <sub>w</sub> H <sub>2</sub> PO <sub>4</sub>                                                        |       |       |       |       |       |      |
| ΔG <sub>aq</sub>                                                                                                                                    |       |       |       |       |       |      |
| nw of Dimer                                                                                                                                         | 0\0   | 0\1   | 0\2   | 0\3   | 0\4   | 0\5  |
| 0                                                                                                                                                   | -6.0  | -6.5  | -4.8  | -3.9  | -5.4  | -1.6 |
| 1                                                                                                                                                   | -11.0 | -11.6 | -9.8  | -9.0  | -10.5 | -6.6 |
| 2                                                                                                                                                   | -5.4  | -6.0  | -4.2  | -3.4  | -4.9  | -1.1 |
| 3                                                                                                                                                   | -12.0 | -12.5 | -10.8 | -10.0 | -11.4 | -7.6 |
| 4                                                                                                                                                   | -8.5  | -9.0  | -7.3  | -6.5  | -7.9  | -4.1 |
| 5                                                                                                                                                   | -8.0  | -8.5  | -6.8  | -6.0  | -7.4  | -3.6 |
| 6                                                                                                                                                   | -8.1  | -8.6  | -6.9  | -6.1  | -7.6  | -3.7 |
|                                                                                                                                                     |       |       |       |       |       |      |
| nw of Dimer                                                                                                                                         | 1\0   | 1\1   | 1\2   | 1\3   | 1\4   | 1\5  |
| 0                                                                                                                                                   | -7.3  | -7.9  | -6.1  | -5.3  | -6.8  | -2.9 |
| 1                                                                                                                                                   | -12.4 | -12.9 | -11.2 | -10.4 | -11.8 | -8.0 |
| 2                                                                                                                                                   | -6.8  | -7.3  | -5.6  | -4.8  | -6.3  | -2.4 |
| 3                                                                                                                                                   | -13.3 | -13.9 | -12.1 | -11.3 | -12.8 | -9.0 |
| 4                                                                                                                                                   | -9.8  | -10.4 | -8.6  | -7.8  | -9.3  | -5.4 |
| 5                                                                                                                                                   | -9.3  | -9.9  | -8.1  | -7.3  | -8.8  | -4.9 |
| 6                                                                                                                                                   | -9.5  | -10.0 | -8.2  | -7.4  | -8.9  | -5.1 |
|                                                                                                                                                     |       |       |       |       |       |      |
| nw of Dimer                                                                                                                                         | 2\0   | 2\1   | 2\2   | 2\3   | 2\4   | 2\5  |
| 0                                                                                                                                                   | -1.2  | -1.7  | 0.0   | 0.8   | -0.7  | 3.2  |
| 1                                                                                                                                                   | -6.3  | -6.8  | -5.0  | -4.2  | -5.7  | -1.9 |
| 2                                                                                                                                                   | -0.7  | -1.2  | 0.5   | 1.3   | -0.1  | 3.7  |
| 3                                                                                                                                                   | -7.2  | -7.8  | -6.0  | -5.2  | -6.7  | -2.8 |
| 4                                                                                                                                                   | -3.7  | -4.3  | -2.5  | -1.7  | -3.2  | 0.7  |
| 5                                                                                                                                                   | -3.2  | -3.8  | -2.0  | -1.2  | -2.7  | 1.2  |
| 6                                                                                                                                                   | -3.3  | -3.9  | -2.1  | -1.3  | -2.8  | 1.1  |
|                                                                                                                                                     |       |       |       |       |       |      |
| nw of Dimer                                                                                                                                         | 3\0   | 3\1   | 3\2   | 3\3   | 3\4   | 3\5  |
| 0                                                                                                                                                   | -2.7  | -3.3  | -1.5  | -0.7  | -2.2  | 1.7  |
| 1                                                                                                                                                   | -7.8  | -8.3  | -6.6  | -5.7  | -7.2  | -3.4 |
| 2                                                                                                                                                   | -2.2  | -2.7  | -1.0  | -0.2  | -1.7  | 2.2  |
| 3                                                                                                                                                   | -8.7  | -9.3  | -7.5  | -6.7  | -8.2  | -4.3 |
| 4                                                                                                                                                   | -5.2  | -5.8  | -4.0  | -3.2  | -4.7  | -0.8 |
| 5                                                                                                                                                   | -4.7  | -5.3  | -3.5  | -2.7  | -4.2  | -0.3 |
| 6                                                                                                                                                   | -4.8  | -5.4  | -3.6  | -2.8  | -4.3  | -0.5 |
|                                                                                                                                                     |       |       |       |       |       |      |
| nw of Dimer                                                                                                                                         | 4\0   | 4\1   | 4\2   | 4\3   | 4\4   | 4\5  |
| 0                                                                                                                                                   | -1.9  | -2.4  | -0.7  | 0.1   | -1.3  | 2.5  |
| 1                                                                                                                                                   | -6.9  | -7.5  | -5.7  | -4.9  | -6.4  | -2.6 |
| 2                                                                                                                                                   | -1.4  | -1.9  | -0.2  | 0.7   | -0.8  | 3.0  |
| 3                                                                                                                                                   | -7.9  | -8.5  | -6.7  | -5.9  | -7.4  | -3.5 |
| 4                                                                                                                                                   | -4.4  | -4.9  | -3.2  | -2.4  | -3.9  | 0.0  |
| 5                                                                                                                                                   | -3.9  | -4.4  | -2.7  | -1.9  | -3.4  | 0.5  |
| 6                                                                                                                                                   | -4.0  | -4.6  | -2.8  | -2.0  | -3.5  | 0.4  |
|                                                                                                                                                     |       |       |       |       |       |      |
| nw of Dimer                                                                                                                                         | 5\0   | 5\1   | 5\2   | 5\3   | 5\4   | 5\5  |
| 0                                                                                                                                                   | -3.8  | -4.4  | -2.6  | -1.8  | -3.3  | 0.6  |
| 1                                                                                                                                                   | -8.9  | -9.4  | -7.7  | -6.9  | -8.4  | -4.5 |

|   |      |       |      |      |      |      |
|---|------|-------|------|------|------|------|
| 2 | -3.3 | -3.9  | -2.1 | -1.3 | -2.8 | 1.1  |
| 3 | -9.9 | -10.4 | -8.7 | -7.8 | -9.3 | -5.5 |
| 4 | -6.4 | -6.9  | -5.1 | -4.3 | -5.8 | -2.0 |
| 5 | -5.9 | -6.4  | -4.6 | -3.8 | -5.3 | -1.5 |
| 6 | -6.0 | -6.5  | -4.8 | -3.9 | -5.4 | -1.6 |

| <b>H<sub>2</sub>PO<sub>4</sub><sup>-</sup> + H<sub>2</sub>PO<sub>4</sub><sup>-</sup> → H<sub>2</sub>P<sub>2</sub>O<sub>7</sub><sup>2-</sup> + H<sub>2</sub>O</b> |      |      |      |      |      |     |
|------------------------------------------------------------------------------------------------------------------------------------------------------------------|------|------|------|------|------|-----|
| ΔG <sub>aq</sub> Exp.=7.7 kcal/mol                                                                                                                               |      |      |      |      |      |     |
| n <sub>w</sub> H <sub>2</sub> PO <sub>4</sub> \n <sub>w</sub> H <sub>2</sub> PO <sub>4</sub>                                                                     |      |      |      |      |      |     |
| ΔG <sub>aq</sub>                                                                                                                                                 |      |      |      |      |      |     |
| nw of Dimer                                                                                                                                                      | 0\0  | 0\1  | 0\2  | 0\3  | 0\4  | 0\5 |
| 0                                                                                                                                                                | -3.8 | -4.3 | -2.5 | -1.7 | -3.2 | 0.6 |
| 1                                                                                                                                                                | -2.8 | -3.4 | -1.6 | -0.8 | -2.3 | 1.5 |
| 2                                                                                                                                                                | -2.4 | -2.9 | -1.1 | -0.3 | -1.8 | 2.0 |
| 3                                                                                                                                                                | -1.7 | -2.3 | -0.5 | 0.3  | -1.2 | 2.7 |
| 4                                                                                                                                                                | -0.5 | -1.1 | 0.7  | 1.5  | 0.0  | 3.9 |
| 5                                                                                                                                                                | -3.1 | -3.7 | -1.9 | -1.1 | -2.6 | 1.3 |
| 6                                                                                                                                                                | -2.8 | -3.3 | -1.6 | -0.8 | -2.2 | 1.6 |
|                                                                                                                                                                  |      |      |      |      |      |     |
| nw of Dimer                                                                                                                                                      | 1\0  | 1\1  | 1\2  | 1\3  | 1\4  | 1\5 |
| 0                                                                                                                                                                | -4.3 | -4.8 | -3.1 | -2.3 | -3.8 | 0.1 |
| 1                                                                                                                                                                | -3.4 | -3.9 | -2.2 | -1.4 | -2.9 | 1.0 |
| 2                                                                                                                                                                | -2.9 | -3.4 | -1.7 | -0.9 | -2.4 | 1.5 |
| 3                                                                                                                                                                | -2.3 | -2.8 | -1.1 | -0.2 | -1.7 | 2.1 |
| 4                                                                                                                                                                | -1.1 | -1.6 | 0.1  | 1.0  | -0.5 | 3.3 |
| 5                                                                                                                                                                | -3.7 | -4.2 | -2.4 | -1.6 | -3.1 | 0.7 |
| 6                                                                                                                                                                | -3.3 | -3.9 | -2.1 | -1.3 | -2.8 | 1.1 |
|                                                                                                                                                                  |      |      |      |      |      |     |
| nw of Dimer                                                                                                                                                      | 2\0  | 2\1  | 2\2  | 2\3  | 2\4  | 2\5 |
| 0                                                                                                                                                                | -2.5 | -3.1 | -1.3 | -0.5 | -2.0 | 1.8 |
| 1                                                                                                                                                                | -1.6 | -2.2 | -0.4 | 0.4  | -1.1 | 2.8 |
| 2                                                                                                                                                                | -1.1 | -1.7 | 0.1  | 0.9  | -0.6 | 3.2 |
| 3                                                                                                                                                                | -0.5 | -1.1 | 0.7  | 1.5  | 0.0  | 3.9 |
| 4                                                                                                                                                                | 0.7  | 0.1  | 1.9  | 2.7  | 1.2  | 5.1 |
| 5                                                                                                                                                                | -1.9 | -2.4 | -0.7 | 0.1  | -1.4 | 2.5 |
| 6                                                                                                                                                                | -1.6 | -2.1 | -0.4 | 0.5  | -1.0 | 2.8 |
|                                                                                                                                                                  |      |      |      |      |      |     |
| nw of Dimer                                                                                                                                                      | 3\0  | 3\1  | 3\2  | 3\3  | 3\4  | 3\5 |
| 0                                                                                                                                                                | -1.7 | -2.3 | -0.5 | 0.3  | -1.2 | 2.7 |
| 1                                                                                                                                                                | -0.8 | -1.4 | 0.4  | 1.2  | -0.3 | 3.6 |
| 2                                                                                                                                                                | -0.3 | -0.9 | 0.9  | 1.7  | 0.2  | 4.1 |
| 3                                                                                                                                                                | 0.3  | -0.2 | 1.5  | 2.3  | 0.8  | 4.7 |
| 4                                                                                                                                                                | 1.5  | 1.0  | 2.7  | 3.5  | 2.0  | 5.9 |
| 5                                                                                                                                                                | -1.1 | -1.6 | 0.1  | 0.9  | -0.5 | 3.3 |
| 6                                                                                                                                                                | -0.8 | -1.3 | 0.5  | 1.3  | -0.2 | 3.6 |
|                                                                                                                                                                  |      |      |      |      |      |     |
| nw of Dimer                                                                                                                                                      | 4\0  | 4\1  | 4\2  | 4\3  | 4\4  | 4\5 |
| 0                                                                                                                                                                | -3.2 | -3.8 | -2.0 | -1.2 | -2.7 | 1.2 |
| 1                                                                                                                                                                | -2.3 | -2.9 | -1.1 | -0.3 | -1.8 | 2.1 |
| 2                                                                                                                                                                | -1.8 | -2.4 | -0.6 | 0.2  | -1.3 | 2.6 |
| 3                                                                                                                                                                | -1.2 | -1.7 | 0.0  | 0.8  | -0.7 | 3.2 |
| 4                                                                                                                                                                | 0.0  | -0.5 | 1.2  | 2.0  | 0.5  | 4.4 |
| 5                                                                                                                                                                | -2.6 | -3.1 | -1.4 | -0.5 | -2.0 | 1.8 |
| 6                                                                                                                                                                | -2.2 | -2.8 | -1.0 | -0.2 | -1.7 | 2.1 |
|                                                                                                                                                                  |      |      |      |      |      |     |
| nw of Dimer                                                                                                                                                      | 5\0  | 5\1  | 5\2  | 5\3  | 5\4  | 5\5 |
| 0                                                                                                                                                                | 0.6  | 0.1  | 1.8  | 2.7  | 1.2  | 5.0 |
| 1                                                                                                                                                                | 1.5  | 1.0  | 2.8  | 3.6  | 2.1  | 5.9 |

|   |     |     |     |     |     |     |
|---|-----|-----|-----|-----|-----|-----|
| 2 | 2.0 | 1.5 | 3.2 | 4.1 | 2.6 | 6.4 |
| 3 | 2.7 | 2.1 | 3.9 | 4.7 | 3.2 | 7.1 |
| 4 | 3.9 | 3.3 | 5.1 | 5.9 | 4.4 | 8.3 |
| 5 | 1.3 | 0.7 | 2.5 | 3.3 | 1.8 | 5.7 |
| 6 | 1.6 | 1.1 | 2.8 | 3.6 | 2.1 | 6.0 |

| <b><math>\text{HPO}_4^{2-} + \text{H}_2\text{PO}_4^- \rightarrow \text{HP}_2\text{O}_7^{3-} + \text{H}_2\text{O}</math></b> |       |       |       |       |       |      |  |
|-----------------------------------------------------------------------------------------------------------------------------|-------|-------|-------|-------|-------|------|--|
| $\Delta\text{G}_{\text{aq}} \text{ Exp.} = 7.1 \text{ kcal/mol}$                                                            |       |       |       |       |       |      |  |
| $n_w\text{HPO}_4 \backslash n_w\text{H}_2\text{PO}_4$                                                                       |       |       |       |       |       |      |  |
| $\Delta\text{G}_{\text{aq}}$                                                                                                |       |       |       |       |       |      |  |
| nw of Dimer                                                                                                                 | 0\0   | 0\1   | 0\2   | 0\3   | 0\4   | 0\5  |  |
| 0                                                                                                                           | -3.2  | -3.8  | -2.0  | -1.2  | -2.7  | 1.1  |  |
| 1                                                                                                                           | -4.6  | -5.1  | -3.4  | -2.6  | -4.0  | -0.2 |  |
| 2                                                                                                                           | -5.1  | -5.7  | -3.9  | -3.1  | -4.6  | -0.7 |  |
| 3                                                                                                                           | -4.9  | -5.5  | -3.7  | -2.9  | -4.4  | -0.5 |  |
| 4                                                                                                                           | -10.2 | -10.7 | -9.0  | -8.2  | -9.7  | -5.8 |  |
| 5                                                                                                                           | -13.7 | -14.3 | -12.5 | -11.7 | -13.2 | -9.3 |  |
| 6                                                                                                                           | -13.1 | -13.7 | -11.9 | -11.1 | -12.6 | -8.7 |  |
|                                                                                                                             |       |       |       |       |       |      |  |
| nw of Dimer                                                                                                                 | 1\0   | 1\1   | 1\2   | 1\3   | 1\4   | 1\5  |  |
| 0                                                                                                                           | -1.0  | -1.6  | 0.2   | 1.0   | -0.5  | 3.4  |  |
| 1                                                                                                                           | -2.3  | -2.9  | -1.1  | -0.3  | -1.8  | 2.0  |  |
| 2                                                                                                                           | -2.9  | -3.4  | -1.7  | -0.9  | -2.3  | 1.5  |  |
| 3                                                                                                                           | -2.7  | -3.2  | -1.5  | -0.7  | -2.1  | 1.7  |  |
| 4                                                                                                                           | -8.0  | -8.5  | -6.8  | -5.9  | -7.4  | -3.6 |  |
| 5                                                                                                                           | -11.5 | -12.0 | -10.3 | -9.5  | -10.9 | -7.1 |  |
| 6                                                                                                                           | -10.9 | -11.4 | -9.7  | -8.9  | -10.3 | -6.5 |  |
|                                                                                                                             |       |       |       |       |       |      |  |
| nw of Dimer                                                                                                                 | 2\0   | 2\1   | 2\2   | 2\3   | 2\4   | 2\5  |  |
| 0                                                                                                                           | -0.2  | -0.7  | 1.0   | 1.8   | 0.4   | 4.2  |  |
| 1                                                                                                                           | -1.5  | -2.1  | -0.3  | 0.5   | -1.0  | 2.9  |  |
| 2                                                                                                                           | -2.0  | -2.6  | -0.8  | 0.0   | -1.5  | 2.3  |  |
| 3                                                                                                                           | -1.8  | -2.4  | -0.6  | 0.2   | -1.3  | 2.5  |  |
| 4                                                                                                                           | -7.1  | -7.7  | -5.9  | -5.1  | -6.6  | -2.7 |  |
| 5                                                                                                                           | -10.6 | -11.2 | -9.4  | -8.6  | -10.1 | -6.3 |  |
| 6                                                                                                                           | -10.0 | -10.6 | -8.8  | -8.0  | -9.5  | -5.7 |  |
|                                                                                                                             |       |       |       |       |       |      |  |
| nw of Dimer                                                                                                                 | 3\0   | 3\1   | 3\2   | 3\3   | 3\4   | 3\5  |  |
| 0                                                                                                                           | 1.0   | 0.5   | 2.2   | 3.0   | 1.5   | 5.4  |  |
| 1                                                                                                                           | -0.3  | -0.9  | 0.9   | 1.7   | 0.2   | 4.1  |  |
| 2                                                                                                                           | -0.9  | -1.4  | 0.3   | 1.2   | -0.3  | 3.5  |  |
| 3                                                                                                                           | -0.7  | -1.2  | 0.5   | 1.4   | -0.1  | 3.7  |  |
| 4                                                                                                                           | -6.0  | -6.5  | -4.7  | -3.9  | -5.4  | -1.6 |  |
| 5                                                                                                                           | -9.5  | -10.0 | -8.3  | -7.4  | -8.9  | -5.1 |  |
| 6                                                                                                                           | -8.9  | -9.4  | -7.7  | -6.8  | -8.3  | -4.5 |  |
|                                                                                                                             |       |       |       |       |       |      |  |
| nw of Dimer                                                                                                                 | 4\0   | 4\1   | 4\2   | 4\3   | 4\4   | 4\5  |  |
| 0                                                                                                                           | -0.5  | -1.1  | 0.7   | 1.5   | 0.0   | 3.9  |  |
| 1                                                                                                                           | -1.9  | -2.4  | -0.7  | 0.2   | -1.3  | 2.5  |  |
| 2                                                                                                                           | -2.4  | -2.9  | -1.2  | -0.4  | -1.9  | 2.0  |  |
| 3                                                                                                                           | -2.2  | -2.7  | -1.0  | -0.2  | -1.7  | 2.2  |  |
| 4                                                                                                                           | -7.5  | -8.0  | -6.3  | -5.5  | -6.9  | -3.1 |  |
| 5                                                                                                                           | -11.0 | -11.5 | -9.8  | -9.0  | -10.5 | -6.6 |  |
| 6                                                                                                                           | -10.4 | -10.9 | -9.2  | -8.4  | -9.9  | -6.0 |  |
|                                                                                                                             |       |       |       |       |       |      |  |
| nw of Dimer                                                                                                                 | 5\0   | 5\1   | 5\2   | 5\3   | 5\4   | 5\5  |  |
| 0                                                                                                                           | 4.4   | 3.9   | 5.6   | 6.5   | 5.0   | 8.8  |  |
| 1                                                                                                                           | 3.1   | 2.6   | 4.3   | 5.1   | 3.6   | 7.5  |  |

|   |      |      |      |      |      |      |
|---|------|------|------|------|------|------|
| 2 | 2.6  | 2.0  | 3.8  | 4.6  | 3.1  | 7.0  |
| 3 | 2.8  | 2.2  | 4.0  | 4.8  | 3.3  | 7.2  |
| 4 | -2.5 | -3.1 | -1.3 | -0.5 | -2.0 | 1.9  |
| 5 | -6.0 | -6.6 | -4.8 | -4.0 | -5.5 | -1.6 |
| 6 | -5.4 | -6.0 | -4.2 | -3.4 | -4.9 | -1.0 |



| <b><math>\text{HPO}_4^{2-} + \text{HPO}_4^{2-} \rightarrow \text{P}_2\text{O}_7^{4-} + \text{H}_2\text{O}</math></b> |       |                                                  |       |       |       |          |  |
|----------------------------------------------------------------------------------------------------------------------|-------|--------------------------------------------------|-------|-------|-------|----------|--|
|                                                                                                                      |       | $\Delta\text{G}_{\text{aq}} \text{ Exp.} = 10.4$ |       |       |       | kcal/mol |  |
| $n_w\text{HPO}_4 \backslash n_w\text{HPO}_4$                                                                         |       |                                                  |       |       |       |          |  |
| $\Delta\text{G}_{\text{aq}}$                                                                                         |       |                                                  |       |       |       |          |  |
| nw of Dimer                                                                                                          | 0\0   | 0\1                                              | 0\2   | 0\3   | 0\4   | 0\5      |  |
| 0                                                                                                                    | 19.7  | 22.0                                             | 22.8  | 24.0  | 22.5  | 27.4     |  |
| 1                                                                                                                    | 15.1  | 17.3                                             | 18.1  | 19.3  | 17.8  | 22.7     |  |
| 2                                                                                                                    | 11.9  | 14.1                                             | 14.9  | 16.1  | 14.6  | 19.5     |  |
| 3                                                                                                                    | 10.3  | 12.5                                             | 13.4  | 14.5  | 13.0  | 18.0     |  |
| 4                                                                                                                    | -0.9  | 1.3                                              | 2.2   | 3.3   | 1.8   | 6.8      |  |
| 5                                                                                                                    | -16.2 | -13.9                                            | -13.1 | -11.9 | -13.4 | -8.5     |  |
| 6                                                                                                                    | -12.1 | -9.9                                             | -9.1  | -7.9  | -9.4  | -4.5     |  |
|                                                                                                                      |       |                                                  |       |       |       |          |  |
| nw of Dimer                                                                                                          | 1\0   | 1\1                                              | 1\2   | 1\3   | 1\4   | 1\5      |  |
| 0                                                                                                                    | 22.0  | 24.2                                             | 25.0  | 26.2  | 24.7  | 29.6     |  |
| 1                                                                                                                    | 17.3  | 19.5                                             | 20.4  | 21.5  | 20.0  | 25.0     |  |
| 2                                                                                                                    | 14.1  | 16.3                                             | 17.2  | 18.3  | 16.8  | 21.8     |  |
| 3                                                                                                                    | 12.5  | 14.8                                             | 15.6  | 16.8  | 15.2  | 20.2     |  |
| 4                                                                                                                    | 1.3   | 3.6                                              | 4.4   | 5.6   | 4.0   | 9.0      |  |
| 5                                                                                                                    | -13.9 | -11.7                                            | -10.9 | -9.7  | -11.2 | -6.3     |  |
| 6                                                                                                                    | -9.9  | -7.7                                             | -6.8  | -5.7  | -7.2  | -2.2     |  |
|                                                                                                                      |       |                                                  |       |       |       |          |  |
| nw of Dimer                                                                                                          | 2\0   | 2\1                                              | 2\2   | 2\3   | 2\4   | 2\5      |  |
| 0                                                                                                                    | 22.8  | 25.0                                             | 25.9  | 27.1  | 25.5  | 30.5     |  |
| 1                                                                                                                    | 18.1  | 20.4                                             | 21.2  | 22.4  | 20.8  | 25.8     |  |
| 2                                                                                                                    | 14.9  | 17.2                                             | 18.0  | 19.2  | 17.7  | 22.6     |  |
| 3                                                                                                                    | 13.4  | 15.6                                             | 16.4  | 17.6  | 16.1  | 21.0     |  |
| 4                                                                                                                    | 2.2   | 4.4                                              | 5.2   | 6.4   | 4.9   | 9.8      |  |
| 5                                                                                                                    | -13.1 | -10.9                                            | -10.0 | -8.9  | -10.4 | -5.4     |  |
| 6                                                                                                                    | -9.1  | -6.8                                             | -6.0  | -4.8  | -6.4  | -1.4     |  |
|                                                                                                                      |       |                                                  |       |       |       |          |  |
| nw of Dimer                                                                                                          | 3\0   | 3\1                                              | 3\2   | 3\3   | 3\4   | 3\5      |  |
| 0                                                                                                                    | 24.0  | 26.2                                             | 27.1  | 28.2  | 26.7  | 31.7     |  |
| 1                                                                                                                    | 19.3  | 21.5                                             | 22.4  | 23.6  | 22.0  | 27.0     |  |
| 2                                                                                                                    | 16.1  | 18.3                                             | 19.2  | 20.4  | 18.8  | 23.8     |  |
| 3                                                                                                                    | 14.5  | 16.8                                             | 17.6  | 18.8  | 17.3  | 22.2     |  |
| 4                                                                                                                    | 3.3   | 5.6                                              | 6.4   | 7.6   | 6.1   | 11.0     |  |
| 5                                                                                                                    | -11.9 | -9.7                                             | -8.9  | -7.7  | -9.2  | -4.2     |  |
| 6                                                                                                                    | -7.9  | -5.7                                             | -4.8  | -3.6  | -5.2  | -0.2     |  |
|                                                                                                                      |       |                                                  |       |       |       |          |  |
| nw of Dimer                                                                                                          | 4\0   | 4\1                                              | 4\2   | 4\3   | 4\4   | 4\5      |  |
| 0                                                                                                                    | 22.5  | 24.7                                             | 25.5  | 26.7  | 25.2  | 30.1     |  |
| 1                                                                                                                    | 17.8  | 20.0                                             | 20.8  | 22.0  | 20.5  | 25.5     |  |
| 2                                                                                                                    | 14.6  | 16.8                                             | 17.7  | 18.8  | 17.3  | 22.3     |  |
| 3                                                                                                                    | 13.0  | 15.2                                             | 16.1  | 17.3  | 15.7  | 20.7     |  |
| 4                                                                                                                    | 1.8   | 4.0                                              | 4.9   | 6.1   | 4.5   | 9.5      |  |
| 5                                                                                                                    | -13.4 | -11.2                                            | -10.4 | -9.2  | -10.7 | -5.8     |  |
| 6                                                                                                                    | -9.4  | -7.2                                             | -6.4  | -5.2  | -6.7  | -1.7     |  |
|                                                                                                                      |       |                                                  |       |       |       |          |  |
| nw of Dimer                                                                                                          | 5\0   | 5\1                                              | 5\2   | 5\3   | 5\4   | 5\5      |  |
| 0                                                                                                                    | 27.4  | 29.6                                             | 30.5  | 31.7  | 30.1  | 35.1     |  |

|   |      |      |      |      |      |      |
|---|------|------|------|------|------|------|
| 1 | 22.7 | 25.0 | 25.8 | 27.0 | 25.5 | 30.4 |
| 2 | 19.5 | 21.8 | 22.6 | 23.8 | 22.3 | 27.2 |
| 3 | 18.0 | 20.2 | 21.0 | 22.2 | 20.7 | 25.7 |
| 4 | 6.8  | 9.0  | 9.8  | 11.0 | 9.5  | 14.4 |
| 5 | -8.5 | -6.3 | -5.4 | -4.2 | -5.8 | -0.8 |
| 6 | -4.5 | -2.2 | -1.4 | -0.2 | -1.7 | 3.2  |
